# Supplementary material for: Lightweight polybenzoxazole aerogels with high compressive strength, ultralow dielectric constants, and excellent thermal stability
Source: Royal Society of Chemistry journal article supplement (doi:10.1039/d3py01325a), 2024-01-01
Supplement: d3py01325a1.pdf [file d3py01325a1.pdf]

## Supporting Information

# Lightweight polybenzoxazole aerogels with high compressive strength, ultralow dielectric constants, and excellent thermal stability

Yi Zhang, Xiaoyun Liu\*, Rui Yang, Qixin Zhuang\*

Laboratory of Specially Functional Polymeric Materials and Related Technology (ECUST), Ministry of Education, East China University of Science and Technology, Shanghai, 200237, China

\*Corresponding Author: Xiaoyun Liu. Email: liuxiaoyun@ecust.edu.cn; Qixin Zhuang. Email: qxzhuang@ecust.edu.cn

### Synthesis procedures

#### BAP-HA

Add 500 ml NMP and 12.5g LiCl to a 1L four-port flask and stir at -10 °C, N<sub>2</sub> for 30 min. Then 0.1 mol BAP and 15 ml propylene oxide were added into the flask, and 0.1 mol TPC monomer was added into the flask after the monomer in the flask was completely dissolved. The whole reaction system was placed at -10 °C for 1h and then at room temperature for 20h. When the reaction is completely completed, water is washed to form white solid precipitation, filtration, vacuum drying to obtain white products.

#### 6FAP-HA

500 ml of NMP and 12.5 g of LiCl, 0.1 mol of 6FAP and 15 ml of propylene oxide were completely dissolved, and 0.1 mol of TPC monomer was added into the flask. The preparation method was similar to that of BAP.

#### DHB-HA

500 ml of DMAc and 12.5 g of LiCl, 0.1 mol of DHB and 15 ml of propylene

oxide, 0.1 mol of TPC monomer, the whole reaction system was placed at -2 °C for 1h, and then at room temperature for 20 h.

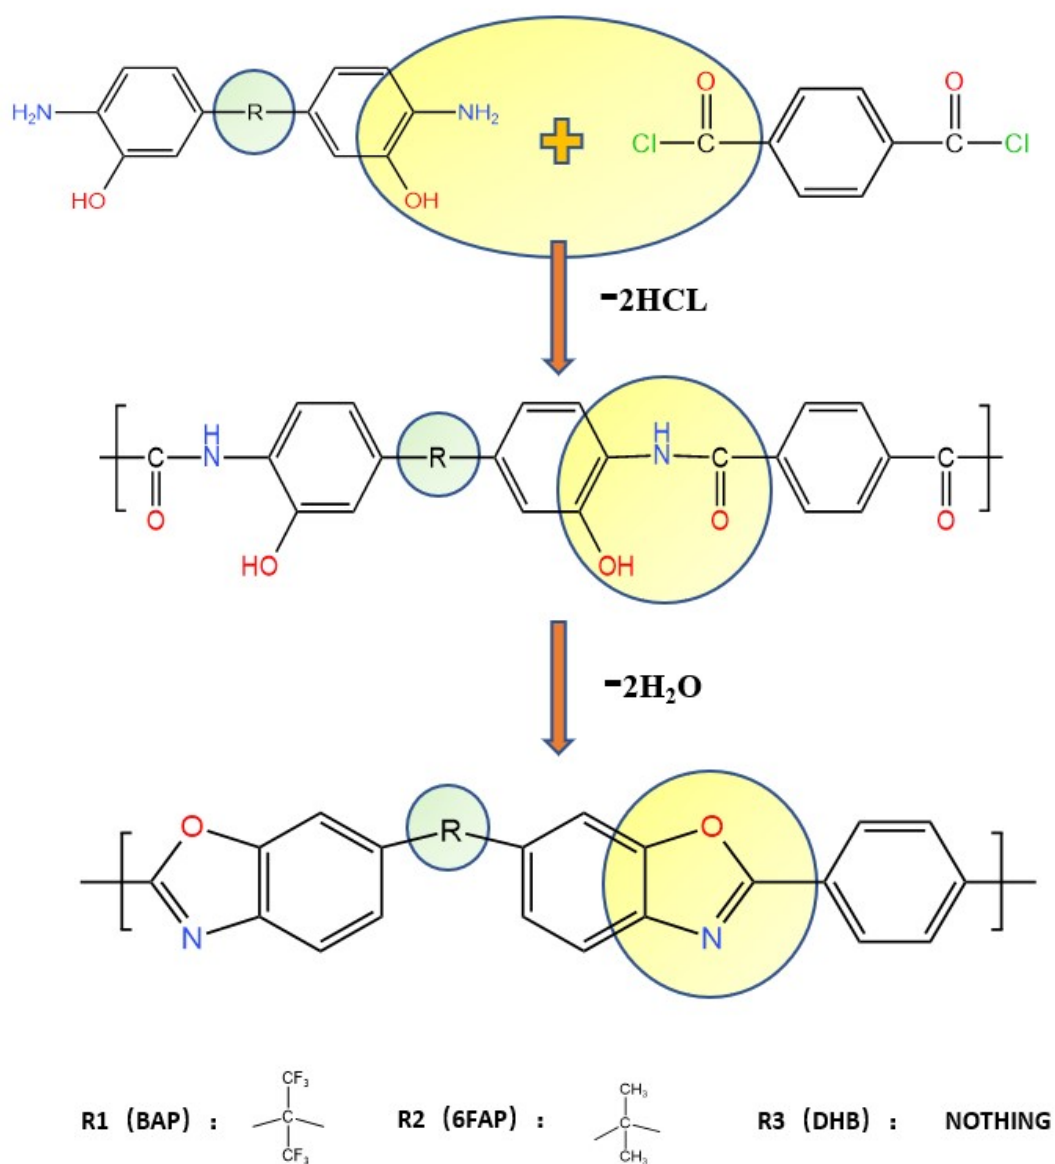

**Scheme S1** Synthesis route of resins

**Table S1** Elemental analysis of aerogels

|         | C/%   | N/%  | O/%   | F/%   |
|---------|-------|------|-------|-------|
| BAP-HA  | 77.87 | 7.25 | 14.88 |       |
| BAP     | 83.93 | 7.4  | 8.66  |       |
| 6FAP-HA | 65.63 | 5.43 | 11.93 | 17.01 |
| 6FAP    | 71.67 | 4.42 | 11.2  | 12.71 |

|        |       |      |       |
|--------|-------|------|-------|
| DHB-HA | 64.93 | 4.57 | 30.49 |
| DHB    | 66.97 | 5.72 | 27.31 |

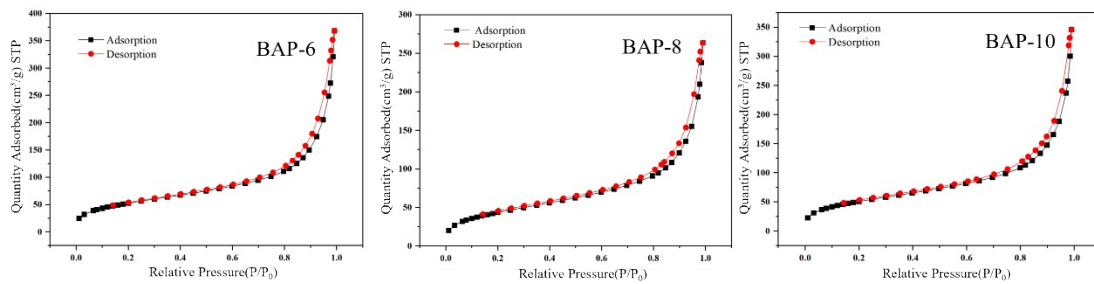

**Figure S1** N<sub>2</sub> Adsorption and Desorption curve of BAP aerogels at different mass fraction

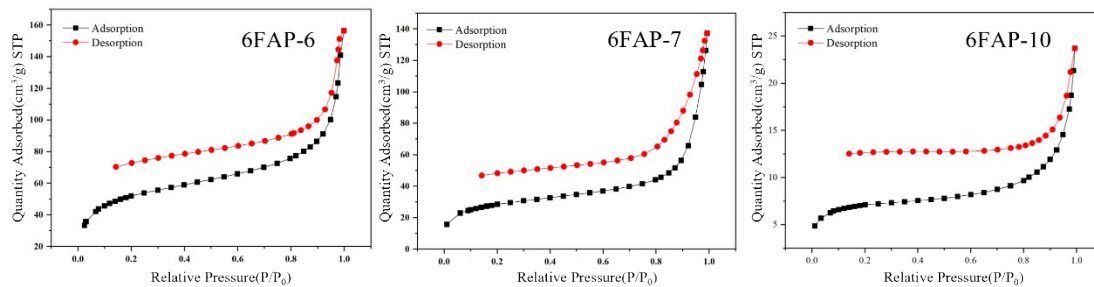

**Figure S2** N<sub>2</sub> Adsorption and Desorption curve of 6FAP aerogels at different mass fraction

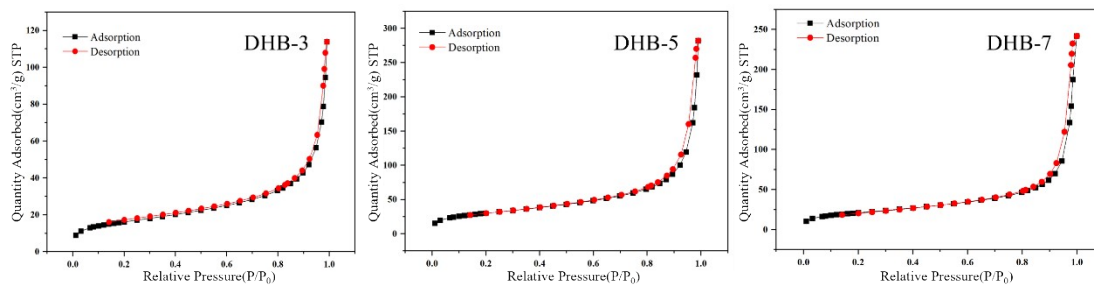

**Figure S3** N<sub>2</sub> Adsorption and Desorption curve of DHB aerogels at different mass fraction

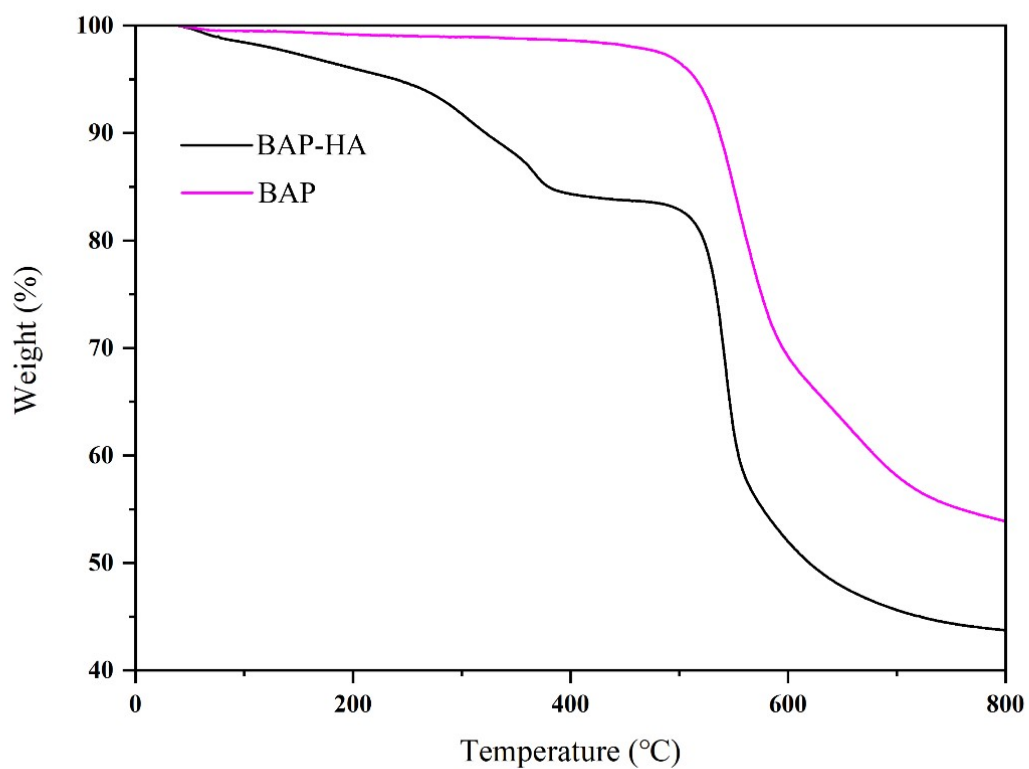

**Figure S4** TG curves of BAP and BAP-HA aerogels

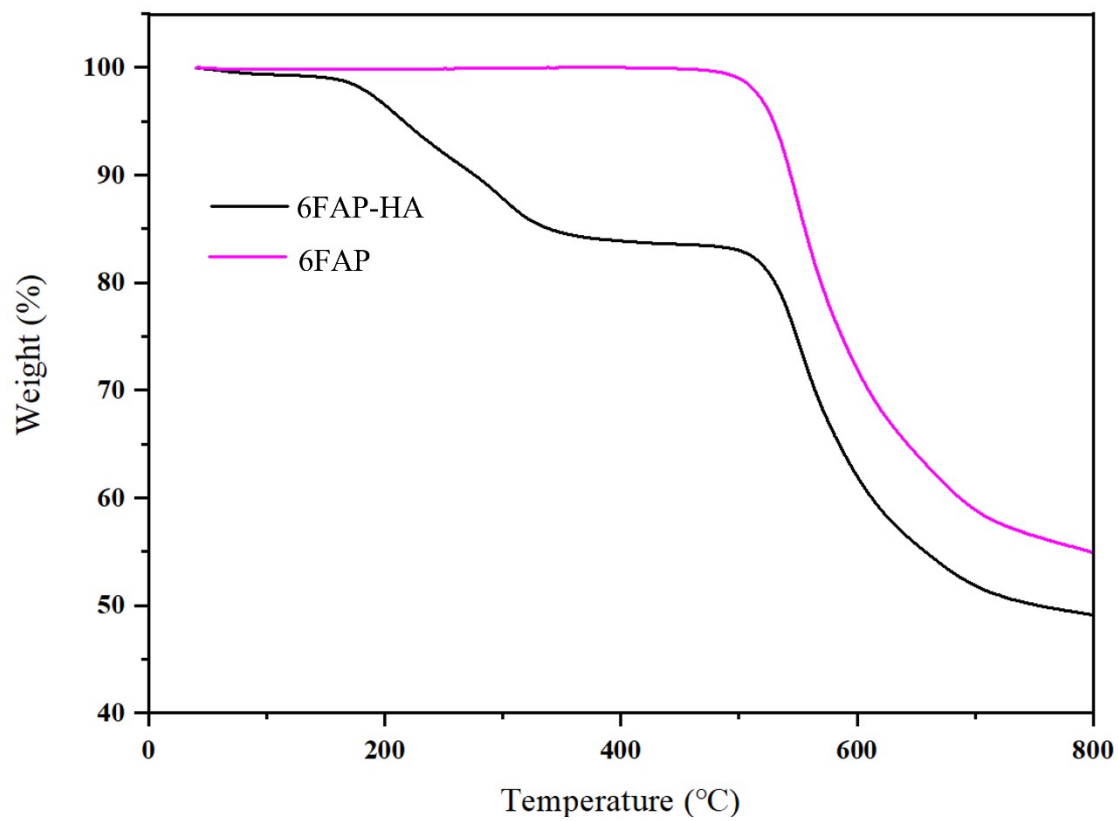

**Figure S5** TGA curves of 6FAP and 6FAP -HA aerogels

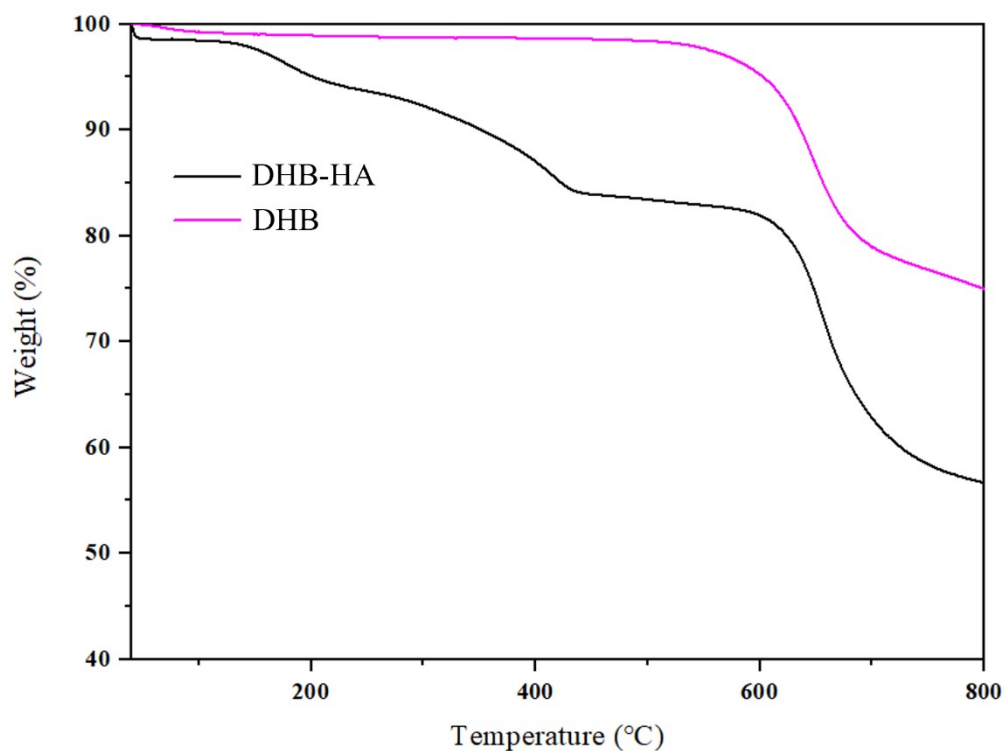

**Figure S6** TGA curves of DHB and DHB-HA aerogels

**Table S2** Porosity of aerogels with different mass fractions

|      | Mass Fraction of polymer in aerogel (%) |      |      |      |      |      |      |      |
|------|-----------------------------------------|------|------|------|------|------|------|------|
|      | 3                                       | 4    | 5    | 6    | 7    | 8    | 9    | 10   |
| BAP  | /                                       | /    | /    | 88.5 | 87.9 | 85.4 | 84.2 | 81.3 |
| 6FAP | /                                       | /    | /    | 91.3 | 89.2 | 88.1 | 85.6 | 82.2 |
| DHB  | 88.5                                    | 89.8 | 88.7 | 86   | 77.5 |      |      |      |
